# Supplementary material
Source: PubMed Central journal article supplement (PMC8612288)
Supplement: aem.01681-21-s0001.pdf [file aem.01681-21-s0001.pdf]

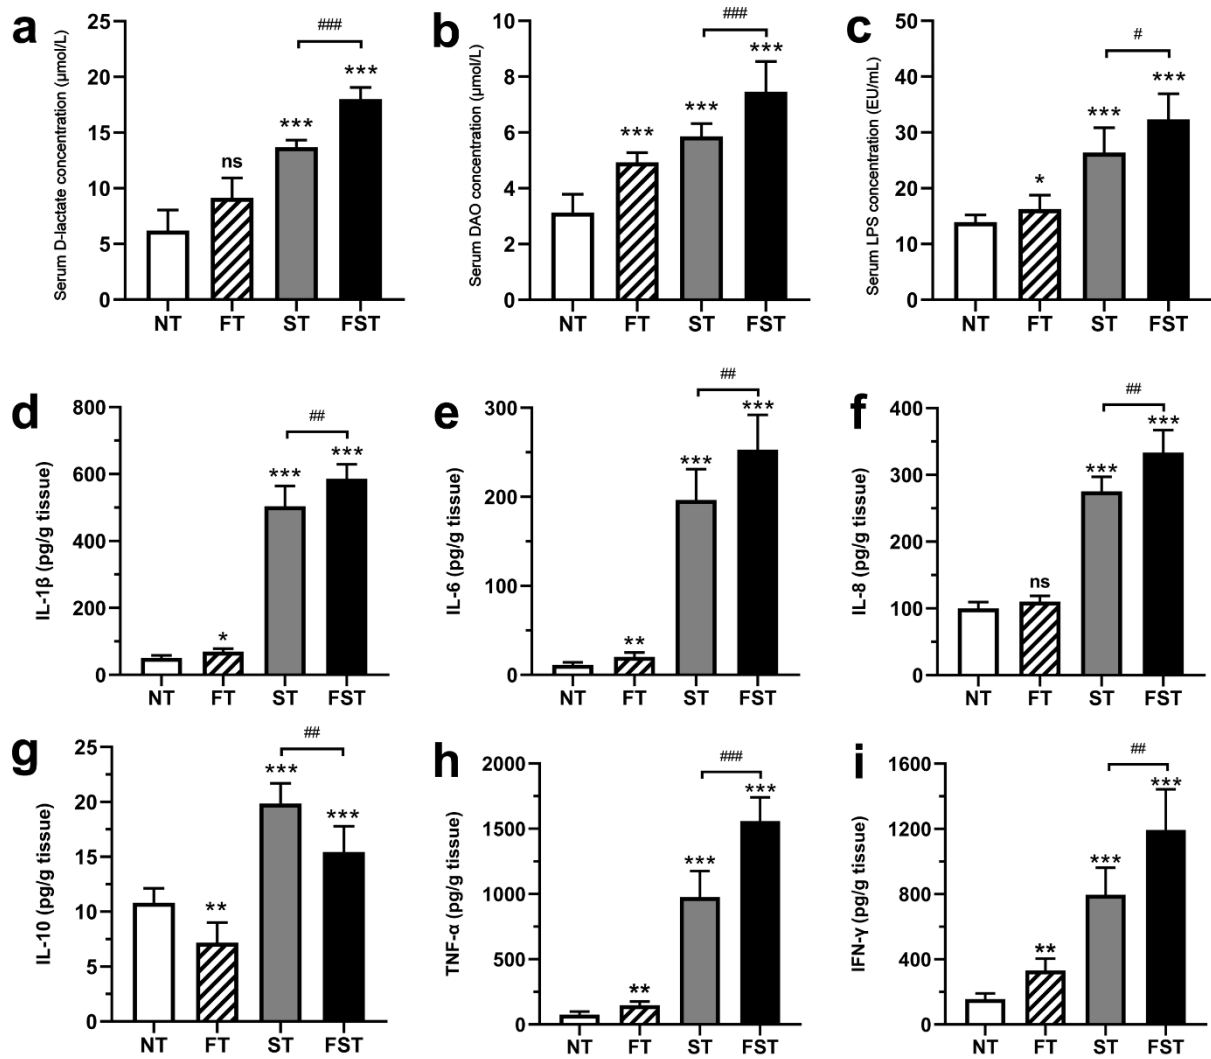

**FIG S1** Effect of florfenicol on intestinal permeability and expression of cytokines in ileum of *S. Enteritidis*-infected chickens. Serum D-lactate (a), serum DAO (b), serum LPS (c), IL-1β (d), serum IL-6 (e), IL-8 (f), IL-10 (g), TNF-α (h) and INF-γ (i) were compared at 3 dpi. Data are expressed as means ± standard deviation. Statistical significance was assessed by ANOVA and denoted as: \*P < 0.05, \*\*P < 0.01, \*\*\*P < 0.001.

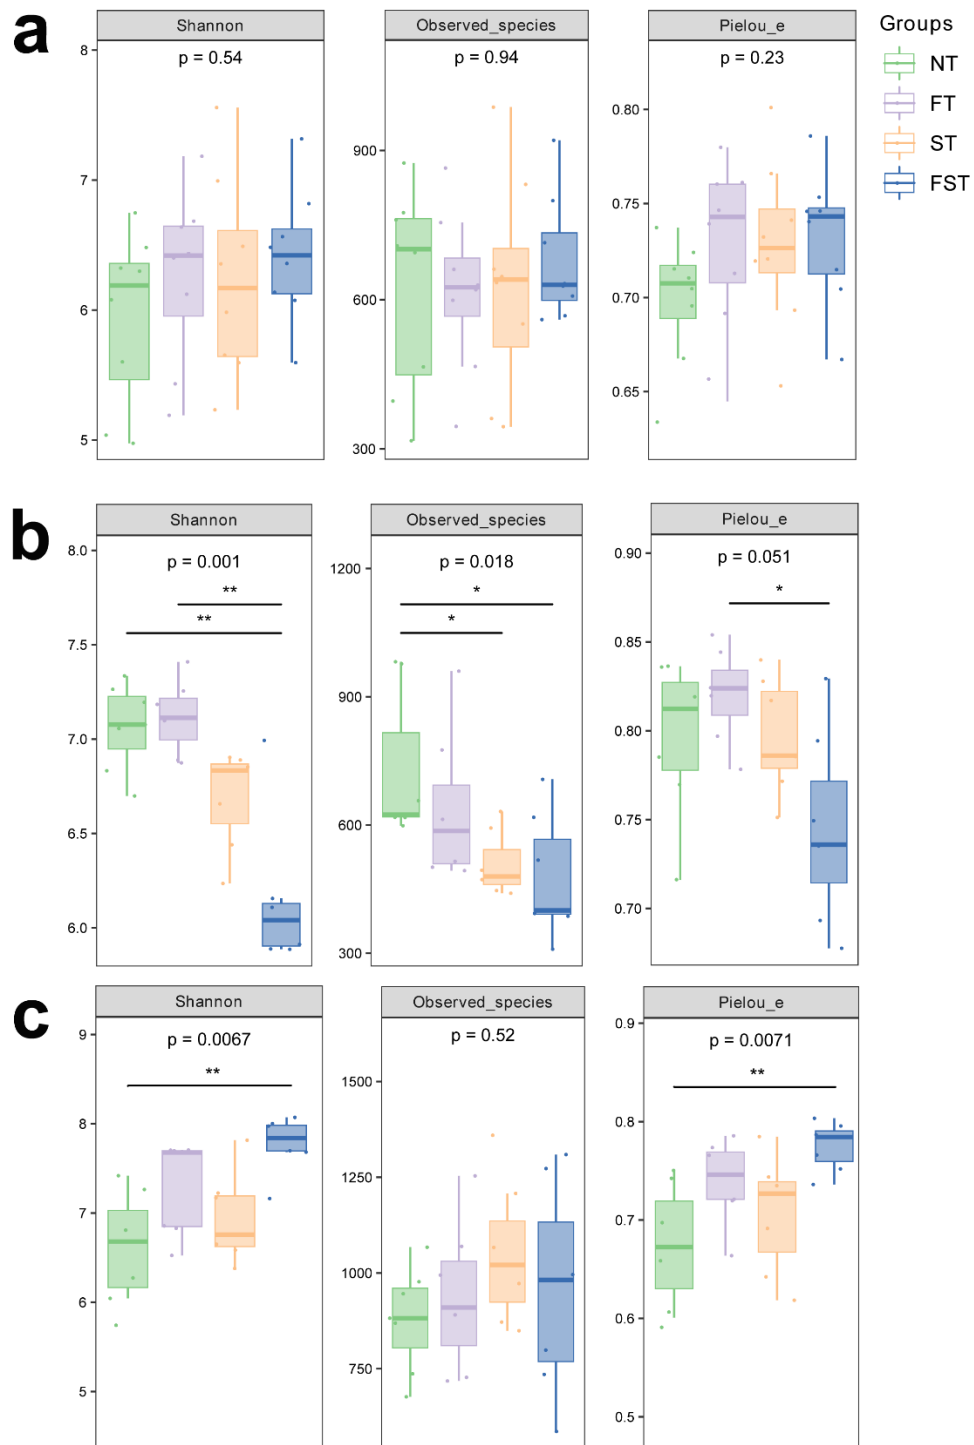

**FIG S2** Effect of florfenicol on  $\alpha$ -diversity of cecal microbiota in normal and *S. Enteritidis*-infected chicks. Boxplots of Shannon index, Observed species, and Pielou index of cecal microbiota in different groups from 3 dpi (a), 10 dpi (b) and 17 dpi (c). \* $P < 0.05$ , \*\* $P < 0.01$ , \*\*\* $P < 0.001$ ; Kruskal-Wallis test.

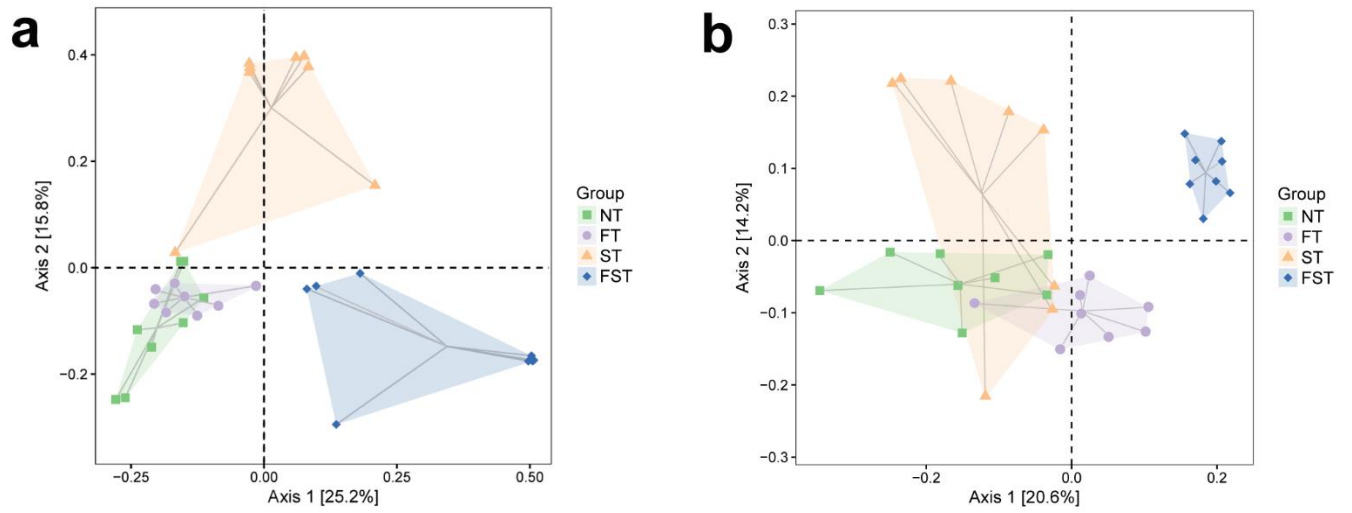

**FIG S3** Effect of florfenicol on the  $\beta$ -diversity of cecal microbial communities in response to *S. Enteritidis* infection. PCoA for comparison of the changes in bacterial communities in different groups at 10 dpi (a) and 17 dpi (b) was generated using the Bray-Curtis distance method.

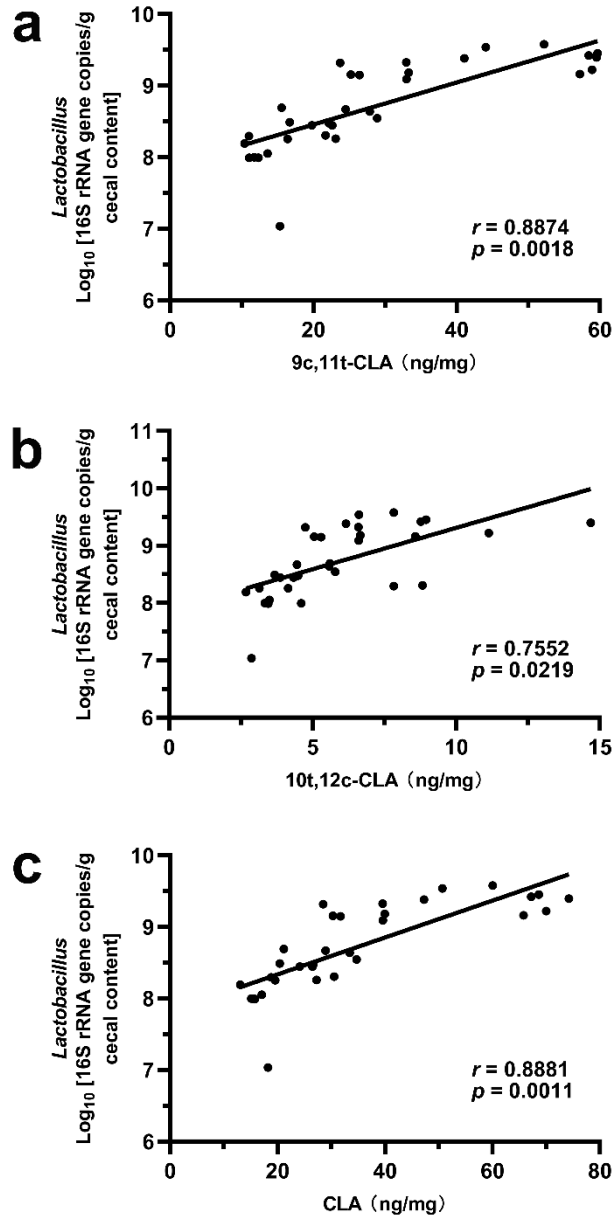

**FIG S4** *Lactobacillus* positively correlates with CLA. Correlations between abundance of *Lactobacillus* present in the cecal content of chicks and: (a) 9c, 11t-CLA (ng/mg); (b) 10t, 12c-CLA (ng/mg); (c) total CLA (ng/mg).

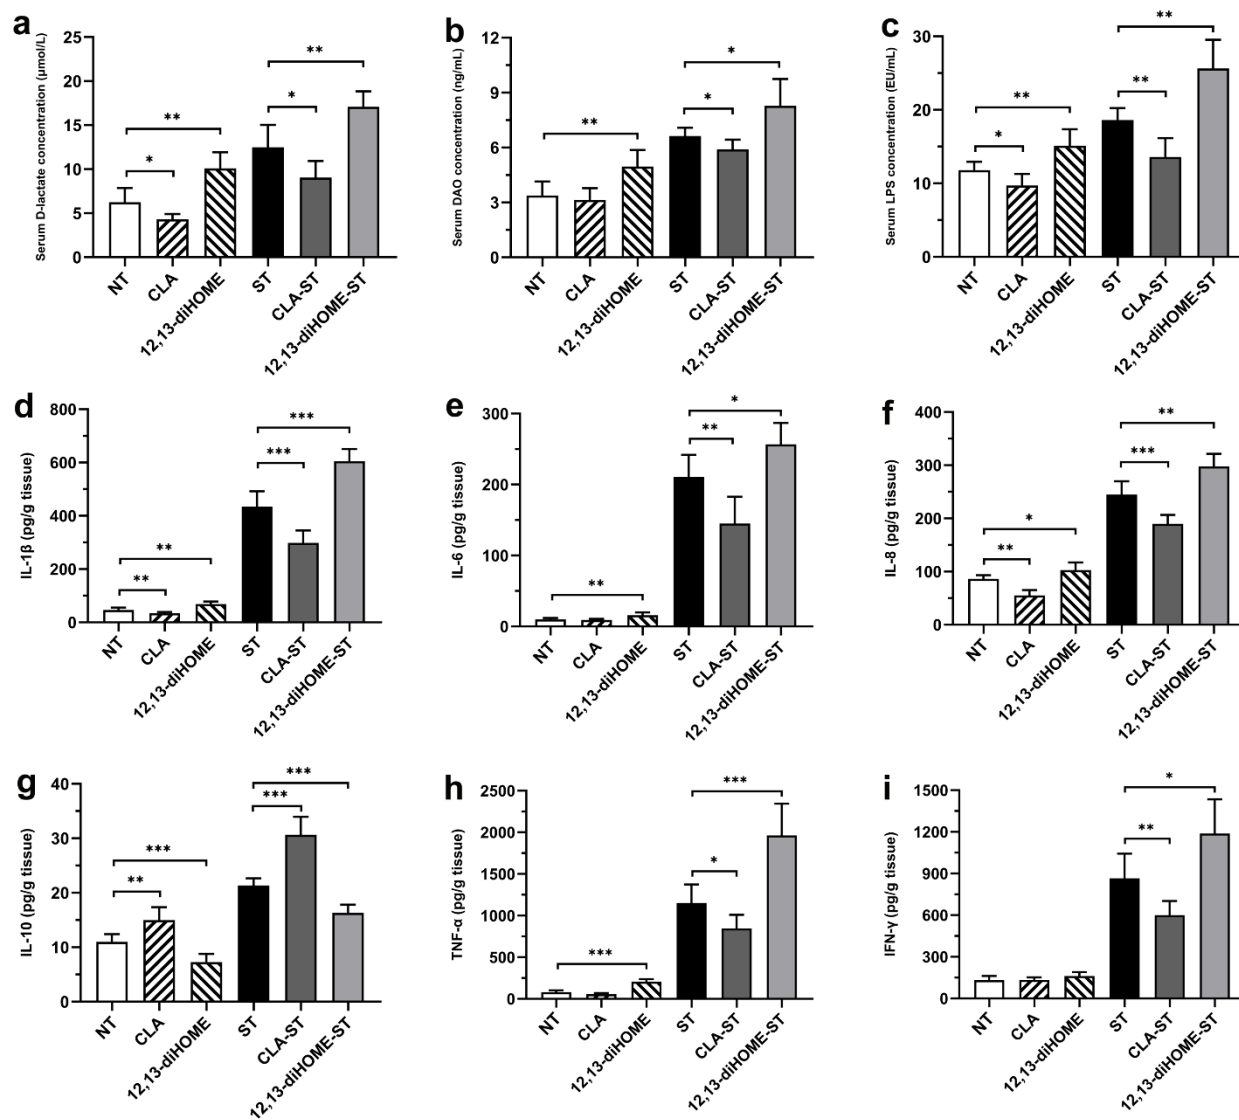

**FIG S5** Effect of CLA and 12,13-diHOME on intestinal permeability and expression of cytokines in ileum of *S. Enteritidis*-infected chickens. Serum D-lactate (a), serum DAO (b), serum LPS (c), IL-1β (d), serum IL-6 (e), IL-8 (f), IL-10 (g), TNF-α (h) and INF-γ (i) were compared at 3 dpi. Data are expressed as means ± standard deviation. Statistical significance was assessed by ANOVA and denoted as: \*P < 0.05, \*\*P < 0.01, \*\*\*P < 0.001.

**Animal protocol 1:**

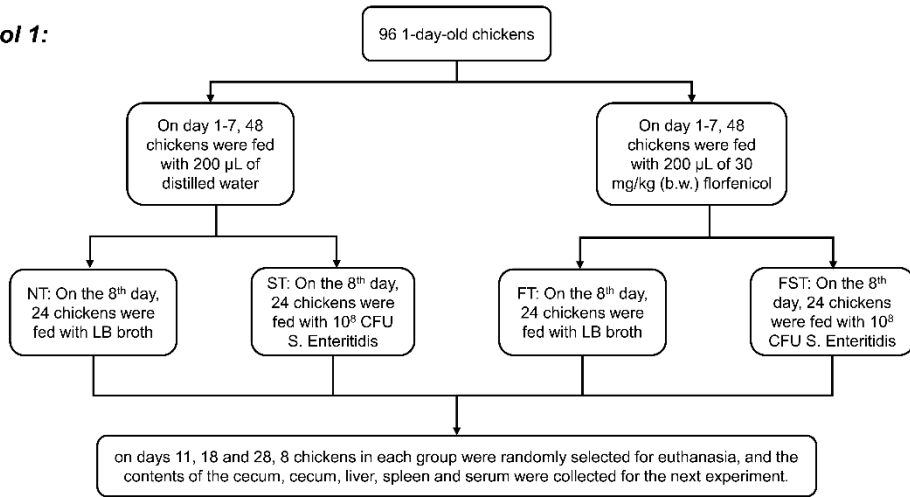

**Animal protocol 2:**

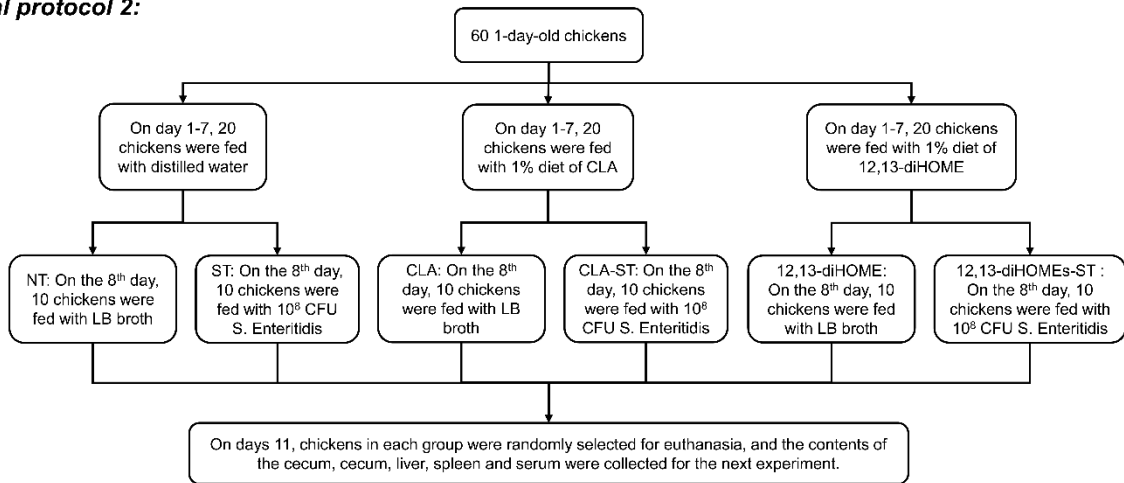

**FIG S6** Animal experiment design and layout. *Animal protocol 1*: effect of florfenicol exposure on *Salmonella* infection; *Animal protocol 2*: effect of CLA and 12,13-diHOME on *Salmonella* infection.

**Table S1** Primers used for bacterial and host qPCR

| <b>Bacterial 16S or 23S rRNA target</b> | <b>Primer</b> | <b>Sequence (5'-3')</b>   |
|-----------------------------------------|---------------|---------------------------|
| <i>Eubacteria</i> (total bacteria)      | Forward       | ACTCCTACGGGAGGCAGCAGT     |
|                                         | Reverse       | ATTACCGCGGCTGCTGGC        |
| <i>Enterobacteriaceae</i>               | Forward       | TGCCGTAACCTTCGGGAGAAGGCA  |
|                                         | Reverse       | TCAAGGCTCAATGTTTCAGTGTC   |
| <i>Lactobacillus</i>                    | Forward       | AGCAGTAGGGAATCTTCCA       |
|                                         | Reverse       | CACCGCTACACATGGAG         |
| <i>Dorea</i>                            | Forward       | GCAGCTAACGCAATAAGCAG      |
|                                         | Reverse       | CTTCCATTACGAAGCGGTC       |
| <i>Clostridium butyricum</i>            | Forward       | GTGCCGCCGCTAACGCATTAAGTAT |
|                                         | Reverse       | ACCATGCACCACCTGTCTTCCTGCC |
| <i>Bacteroidetes</i>                    | Forward       | GGARCATGTGGTTTAATTCGATGAT |
|                                         | Reverse       | AGCTGACGACAACCATGCAG      |
| <b>Host gene target</b>                 | <b>Primer</b> | <b>Sequence (5'-3')</b>   |
| ZO-1                                    | Forward       | GCCTGAATCAAACCCAGCAA      |
|                                         | Reverse       | TATGCGCGGTAAGGATGAT       |
| Occludin                                | Forward       | GATGGACAGCATCAACGACC      |
|                                         | Reverse       | CATGCGCTTGATGTGGAAGA      |
| Claudin 3                               | Forward       | GAAGGGCTGTGGATGAACTG      |
|                                         | Reverse       | GAGACGATGGTGATCTTGGC      |
| MUC2                                    | Forward       | AATGCTGAGTTCTTGCCTAA      |
|                                         | Reverse       | GTTGCAGTTCATATCCTGGT      |
| TFF2                                    | Forward       | CCCTGCTGATCCTCGTAT        |
|                                         | Reverse       | GCTGTTATTTCCCAGTTGA       |
| IL-22                                   | Forward       | CAGGAATCGCACCTACACCT      |
|                                         | Reverse       | TCATGTAGCAGCGGTTGTTC      |
| IL-17A                                  | Forward       | CCATTCCAGGTGCGTGAACCT     |
|                                         | Reverse       | TTTCTTCTCCAGGCGGTACG      |
| IFN- $\alpha$                           | Forward       | CCAGCACCTCGAGCAAT         |
|                                         | Reverse       | GCGCTGTAATCGTTGTCT        |
| GAPDH                                   | Forward       | TCTCTGGCAAAGTCCAAGTG      |
|                                         | Reverse       | CTTGAAGTGTCCGTGTGTAGAA    |

**Table S2** Differential metabolites of cecal content in different group sets

| <b>Compound</b>             | <b>VIP value</b> | <b>Fold change (FT-NT)</b> |
|-----------------------------|------------------|----------------------------|
| LysoPE(0:0/16:0)            | 1.39611          | 1.829127912                |
| Phytosphingosine            | 1.82172          | 2.391519065                |
| Kynurenic acid              | 1.58781          | 1.32017953                 |
| Stearidonic acid            | 1.45078          | 0.762002229                |
| Octadecanamide              | 1.50001          | 1.048119468                |
| Stearoylcarnitine           | 1.69755          | 2.230264288                |
| L-Glutamate                 | 1.69534          | 2.647962778                |
| Tetracosahexaenoic acid     | 1.37745          | -4.256204048               |
| 3-Indolepropionic acid      | 1.48629          | 1.654602046                |
| Syringic acid               | 1.9675           | 2.591620047                |
| Methamphetamine             | 1.38677          | -4.294895853               |
| L-Palmitoylcarnitine        | 1.3594           | 2.433415468                |
| Dodecanedioic acid          | 1.81947          | -2.553967404               |
| Anandamide                  | 1.72204          | -4.126681323               |
| hydrocinnamic acid          | 1.56801          | 0.956241528                |
| Linoleic acid               | 1.55562          | 3.036584872                |
| Ricinoleic acid             | 1.4407           | 2.541515312                |
| p-Aminobenzoic acid         | 1.59528          | 1.416099173                |
| 13-HDoHE                    | 1.5072           | 1.614593796                |
| N-Acetyl-L-methionine       | 1.51667          | 0.77972235                 |
| Androstenol                 | 1.48051          | 1.805266093                |
| L-Isoleucine                | 1.59496          | 1.432195562                |
| Cinnamic acid               | 1.50697          | 1.472848477                |
| Creatine                    | 1.49684          | 1.06131712                 |
| Pantothenic Acid            | 1.67721          | 2.57961707                 |
| L-Tryptophan                | 1.63324          | 1.449201617                |
| 12,13-EpOME                 | 1.62341          | 4.469650467                |
| L-Tyrosine                  | 1.40308          | 0.699634193                |
| Adenosine                   | 1.47445          | 2.243025557                |
| N6,N6,N6-Trimethyl-L-lysine | 1.42211          | -1.689249154               |
| 3-Hydroxyanthranilic acid   | 1.69687          | 1.719421014                |
| Glycylleucine               | 1.55493          | 1.659377013                |
| 12,13-diHOME                | 1.56895          | 7.994652917                |
| LysoPE(20:0/0:0)            | 1.89989          | 1.809808066                |
| Xanthurenic acid            | 2.0962           | 1.717569376                |
| Acetylcarnitine             | 1.62655          | 0.827224224                |
| LysoPC(14:0)                | 1.59089          | 1.293272182                |
| 1-Methylguanine             | 1.37433          | -1.271014565               |
| Vitamin A                   | 1.53692          | 1.126347198                |
| Hexanoylcarnitine           | 1.51544          | 1.381526102                |



|                           |         |              |
|---------------------------|---------|--------------|
| Acetylcholine             | 1.53842 | 1.440701802  |
| L-Phenylalanine           | 1.50505 | 1.470457546  |
| Adenine                   | 1.45115 | 2.837115373  |
| LysoPE(18:0/0:0)          | 1.80815 | 1.431342848  |
| QH(2)                     | 1.4405  | 2.052805741  |
| N-Acetyl-D-glucosamine    | 1.36669 | -0.575336932 |
| L-Dopa                    | 1.60085 | 1.13622862   |
| L-Arginine                | 1.47707 | 1.135803137  |
| MG(P-18:0e/0:0/0:0)       | 1.48374 | 2.372686188  |
| L-Valine                  | 1.36891 | 1.218955241  |
| Pyroglutamic acid         | 1.36302 | 0.443618789  |
| 5-Aminopentanoic acid     | 1.61074 | 0.984877935  |
| acetophenone              | 1.50397 | 2.077766733  |
| gamma-Aminobutyric acid   | 1.65933 | 1.315620616  |
| DHAP(10:0)                | 1.38044 | 0.783071918  |
| Benzoic acid              | 1.83512 | 1.264673024  |
| Niacinamide               | 1.46789 | 0.904334539  |
| Choline                   | 1.40391 | 1.271636765  |
| gamma-Glutamylcysteine    | 1.96829 | 0.689634575  |
| Xanthosine                | 1.59451 | -1.121281824 |
| Taurocholic acid          | 1.58083 | 2.700112967  |
| Tetradecanedioic acid     | 1.87358 | -4.548811504 |
| Tauroursodeoxycholic acid | 1.97904 | 2.998046677  |
| Sebacic acid              | 2.33912 | -1.991768331 |
| Ribonic acid              | 1.66162 | 3.146818765  |
| L-Ascorbic acid           | 1.78324 | -1.881321665 |
| Oxoadipic acid            | 1.65964 | 1.179545557  |
| DL-2-Aminoadipic acid     | 1.80898 | 1.146523006  |
| Pimelic acid              | 1.46471 | -0.637229481 |
| 3-Hydroxypicolinic acid   | 2.0197  | -0.790658614 |
| L-Arabitol                | 1.45687 | 2.266739636  |

---

| <b>Compound</b>        | <b>VIP value</b> | <b>Fold change (ST-NT)</b> |
|------------------------|------------------|----------------------------|
| LysoPE(0:0/16:0)       | 1.4496           | 3.481737371                |
| Phytosphingosine       | 1.52776          | 1.592384062                |
| Alpha-Tocotrienol      | 1.7476           | -1.785491958               |
| Palmitic amide         | 1.43074          | 0.778172326                |
| Glucose 6-phosphate    | 1.43218          | 2.277174679                |
| Octadecanamide         | 1.70732          | 0.982474063                |
| MG(0:0/14:0/0:0)       | 1.80987          | 2.680202659                |
| Methamphetamine        | 1.37498          | -6.311569107               |
| Anandamide             | 1.65535          | -3.882060603               |
| 3-Oxohexadecanoic acid | 1.57015          | 3.850803532                |

|                         |         |              |
|-------------------------|---------|--------------|
| Prostaglandin F1a       | 1.52815 | 2.46413986   |
| p-Aminobenzoic acid     | 1.48707 | 1.954157026  |
| 13-HDoHE                | 1.40768 | 1.918124518  |
| N-Acetyl-L-methionine   | 1.40131 | 0.754827151  |
| Phosphocholine          | 1.55202 | 3.438641792  |
| Androstenol             | 1.42131 | 2.13902204   |
| Pantothenic Acid        | 1.50101 | 2.195213934  |
| L-Glutamate             | 1.38699 | 2.211475066  |
| 3-Hydroxypicolinic acid | 2.06276 | -1.813504968 |
| Xanthurenic acid        | 1.66744 | 1.370329373  |
| Acetylcarnitine         | 1.6146  | 1.756399319  |
| Hexanoylcarnitine       | 1.55398 | 2.618099366  |
| Agmatine                | 1.41379 | -1.548909222 |
| Acetylcholine           | 1.52897 | 1.533418091  |
| L-Arginine              | 1.58816 | 1.295701572  |
| Jasmonic acid           | 1.60925 | -1.580062717 |
| Gamma-Tocotrienol       | 2.00752 | -2.31237927  |
| 3-Indoleacetic Acid     | 1.52672 | -1.589484144 |
| N-Acetylputrescine      | 1.40706 | -0.906352868 |
| L-Proline               | 1.92109 | -1.228515711 |
| Maltitol                | 1.52127 | -1.895084115 |
| Deoxycholic acid        | 1.419   | -4.040597938 |
| Vitamin A               | 1.52456 | -0.867762178 |
| Prostaglandin A2        | 1.88831 | -1.150186154 |
| Riboflavin              | 1.72363 | -1.802289433 |
| Lithocholic acid        | 1.44492 | -5.87927103  |
| Abscisic acid           | 1.78497 | -0.756908613 |
| Sebacic acid            | 2.16878 | -1.598290569 |
| Oxoadipic acid          | 1.60838 | 1.24635069   |
| DL-2-Amino adipic acid  | 1.59324 | 1.030199257  |
| Mevalonic acid          | 1.48103 | 1.563893484  |
| L-Arabitol              | 1.72051 | 4.158005369  |

---

| <b>Compound</b>          | <b>VIP value</b> | <b>Fold change (FST-NT)</b> |
|--------------------------|------------------|-----------------------------|
| Cinnamic acid            | 1.43992          | 2.703635592                 |
| LysoPE(0:0/16:0)         | 1.43182          | 2.5117326                   |
| Phytosphingosine         | 2.04975          | 1.986185762                 |
| Leucylproline            | 1.98478          | 1.851524634                 |
| Kynurenic acid           | 1.7098           | 1.219018183                 |
| DL-2-Amino octanoic acid | 1.38835          | 0.768609868                 |
| 3-Indolepropionic acid   | 1.90076          | 4.461901507                 |
| Syringic acid            | 2.23866          | 3.078865508                 |
| Methamphetamine          | 1.39256          | -4.55929079                 |

|                             |         |              |
|-----------------------------|---------|--------------|
| L-Palmitoylcarnitine        | 1.47038 | 2.629265249  |
| Alanylproline               | 1.5974  | 0.510109715  |
| Anandamide                  | 1.72808 | -4.291065328 |
| Linoleic acid               | 1.45238 | 1.478622708  |
| p-Aminobenzoic acid         | 1.72266 | 0.85562942   |
| N-Acetyl-L-methionine       | 1.74627 | 0.879515457  |
| Dodecanoylcarnitine         | 1.57485 | -4.497912518 |
| L-Isoleucine                | 1.67578 | 2.211052657  |
| L-Phenylalanine             | 1.43065 | 2.686265148  |
| Pantothenic Acid            | 2.0976  | 2.30738253   |
| L-Norleucine                | 1.40984 | 1.155267625  |
| L-Tryptophan                | 1.60781 | 2.297523805  |
| 12,13-EpOME                 | 1.60988 | 2.448364017  |
| L-Methionine                | 1.5779  | 1.819252502  |
| Urocanic acid               | 1.76454 | 0.942676897  |
| L-Tyrosine                  | 1.78508 | 1.557881882  |
| Glycylleucine               | 1.43032 | 3.581452911  |
| N6,N6,N6-Trimethyl-L-lysine | 1.67502 | -3.210622506 |
| 12,13-diHOME                | 1.53023 | 5.649873041  |
| Bilirubin                   | 1.3852  | -1.064770931 |
| 5'-Methylthioadenosine      | 1.55559 | 0.495600108  |
| Glutamylleucine             | 1.39844 | 2.673354257  |
| LysoPE(20:0/0:0)            | 1.39773 | 2.946797528  |
| Norepinephrine              | 1.39502 | 0.444847909  |
| Acetylcarnitine             | 1.46912 | 0.638635163  |
| 4-Pyridoxic acid            | 1.51644 | -0.716787952 |
| LysoPE(18:0/0:0)            | 1.46056 | 2.545971698  |
| N-Acetyl-D-glucosamine      | 1.42657 | -0.699549345 |
| L-Valine                    | 1.51147 | 0.800046414  |
| Thymine                     | 1.70023 | 1.063475055  |
| Pyroglutamic acid           | 1.62851 | 0.578966596  |
| Uracil                      | 1.52934 | 0.276832643  |
| Anthranilic acid            | 1.87681 | 1.472959506  |
| Acetoacetic acid            | 1.36386 | -0.96299723  |
| L-Proline                   | 1.90616 | 0.655623559  |
| gamma-Aminobutyric acid     | 1.40762 | 0.550493831  |
| Benzoic acid                | 1.92242 | 1.971645349  |
| Choline                     | 1.61916 | 2.227098982  |
| Cholic acid                 | 1.59267 | 1.721624591  |
| 9,12,13-TriHOME             | 1.76847 | 0.909013359  |
| 7-Ketodeoxycholic acid      | 1.47884 | 3.057090822  |
| Prostaglandin A2            | 1.46131 | -0.729895116 |
| gamma-Glutamylcysteine      | 1.47696 | 0.44016878   |
| Taurocholic acid            | 1.46752 | 2.695106091  |

|                           |         |              |
|---------------------------|---------|--------------|
| MG(0:0/15:0/0:0)          | 1.6415  | 1.404584772  |
| Abscisic acid             | 1.46093 | -1.571901825 |
| Tauroursodeoxycholic acid | 1.85322 | 2.470980718  |
| N-Acetyl-L-phenylalanine  | 1.47184 | 1.114728441  |
| Xanthurenic acid          | 1.55581 | 0.773738658  |
| Caffeic Acid              | 1.45106 | 1.156454677  |
| Citric acid               | 1.59456 | 1.478525358  |
| Ribonic acid              | 1.4903  | 1.641496722  |
| L-Ascorbic acid           | 1.99091 | -3.321106442 |
| L-3-Phenyllactic acid     | 1.5724  | 1.60013447   |
| Oxoadipic acid            | 1.48361 | 1.14726273   |
| Oxoglutaric acid          | 1.54047 | 1.68390509   |
| DL-2-Aminoadipic acid     | 2.13987 | 1.19424498   |
| Pimelic acid              | 2.09643 | -1.028867534 |
| D-2-Hydroxyglutaric acid  | 2.27341 | 1.300347595  |
| Fumaric acid              | 1.59133 | -0.856132678 |

| <b>Compound</b>         | <b>VIP value</b> | <b>Fold change (FST-ST)</b> |
|-------------------------|------------------|-----------------------------|
| 9-HOTE                  | 1.48485          | 0.303790663                 |
| Leucylproline           | 1.70616          | 1.144383582                 |
| Glucose 6-phosphate     | 1.51163          | -2.326664278                |
| Octadecanamide          | 1.87365          | -0.507471409                |
| DL-2-Aminooctanoic acid | 1.73001          | 1.145522942                 |
| Inosine                 | 1.60348          | 0.488953943                 |
| 3-Indolepropionic acid  | 1.98678          | 4.448026386                 |
| Abscisic acid           | 1.94412          | 0.693852937                 |
| MG(0:0/14:0/0:0)        | 1.88269          | -2.396425517                |
| Sphinganine             | 1.46259          | -1.353688662                |
| Alpha-Tocotrienol       | 1.78427          | 1.573340492                 |
| MG(0:0/16:0/0:0)        | 1.75446          | -1.173105075                |
| Docosanamide            | 1.94906          | -1.623745682                |
| 3-Oxohexadecanoic acid  | 1.67798          | -4.140822579                |
| Phosphocholine          | 1.53266          | -2.469506451                |
| Dodecanoylcarnitine     | 1.77728          | -3.172944392                |
| Creatine                | 1.51359          | -0.640881169                |
| 12,13-EpOME             | 1.61941          | 3.823295465                 |
| 12,13-diHOME            | 1.54795          | 6.178657304                 |
| Cholestenone            | 1.65806          | 1.411480517                 |
| Stigmasterol            | 1.76371          | 0.812126162                 |
| Alanylproline           | 1.59357          | 0.510184612                 |
| 3-Hydroxypicolinic acid | 1.5083           | 1.31676859                  |
| Acetylcarnitine         | 1.494            | -1.117764156                |
| Agmatine                | 1.59512          | 1.906900037                 |

|                         |         |              |
|-------------------------|---------|--------------|
| Acetylcholine           | 1.65862 | -1.674756867 |
| Leukotriene A4          | 1.82758 | 0.875895561  |
| Jasmonic acid           | 1.60353 | 3.291211347  |
| Gamma-Tocotrienol       | 1.54301 | 3.294728599  |
| 3-Indoleacetic Acid     | 2.20801 | 1.887321531  |
| Tyramine                | 1.52292 | 1.129114722  |
| Thymine                 | 1.86664 | 1.449681321  |
| Indole                  | 1.78473 | 0.41691403   |
| Anthranilic acid        | 2.05673 | 1.873975616  |
| L-Proline               | 1.60613 | 0.463939663  |
| Maltitol                | 2.20513 | 2.16449355   |
| alpha-Tocopherol        | 1.70547 | -1.373407256 |
| Octadecanedioic acid    | 1.46753 | 0.764335022  |
| Deoxycholic acid        | 1.85869 | 4.260337761  |
| Urobilin                | 1.68187 | 1.792473085  |
| gamma-Glutamylcysteine  | 2.00579 | 0.554982865  |
| Nutriacholic acid       | 1.49181 | 1.67148456   |
| Prostaglandin G2        | 1.48664 | 0.700765456  |
| Prostaglandin E1        | 1.63335 | 0.890821767  |
| Abscisic acid           | 1.89171 | 0.999427992  |
| 12-Hydroxystearic acid  | 1.72965 | -1.090242628 |
| Jasmonic acid           | 1.67078 | 2.943268971  |
| Sebacic acid            | 1.49948 | 1.093535982  |
| Decenedioic acid        | 1.55915 | 1.196605122  |
| Xanthurenic acid        | 1.65874 | -0.791642226 |
| Kynurenic acid          | 1.58615 | 0.906834108  |
| D-Mannitol              | 1.54799 | -1.883904931 |
| Caffeic Acid            | 1.85991 | 1.956615942  |
| L-Ascorbic acid         | 1.51678 | -4.243989453 |
| 3-Hydroxypicolinic acid | 2.06757 | 2.366329392  |
| L-Arabitol              | 1.75568 | -4.03475644  |
| Fumaric acid            | 1.47533 | -1.038164572 |

---
